# Supplementary material for: Association of Body Mass Index with DNA Methylation and Gene Expression in Blood Cells and Relations to Cardiometabolic Disease: A Mendelian Randomization Approach
Source: PLoS Med. 2017 Jan 17;14(1):e1002215. doi: 10.1371/journal.pmed.1002215 (PMC5240936; doi:10.1371/journal.pmed.1002215)
Supplement: S5 Table — (XLSX) [file pmed.1002215.s023.xlsx]

## Sheet: Suppl Table 5
S5 Table: Secondary models testing age and sex interactions
Probename	Gene Name	FHS-LBC Meta-analysis p-value (model 1)	FHS-LBC Meta-analysis p-value (sex-interaction)	FHS-LBC Meta-analysis p-value (age-interaction)
cg06500161	ABCG1	7.55e-43	0.397576	0.0358503
cg00574958	CPT1A	2.2e-29	0.334359	0.458715
cg11024682	SREBF1	4.82e-22	0.0878765	0.249362
cg17501210	RPS6KA2	4.14e-21	0.729362	0.152417
cg04927537	LGALS3BP	7.11e-17	0.93836	0.315522
cg06397161	SYNGR1	1.02e-16	0.885945	0.829701
cg14870271	LGALS3BP	4.87e-16	0.791184	0.331703
cg27243685	ABCG1	2.29e-15	0.00820971	0.466197
cg11202345	LGALS3BP	6.22e-15	0.342235	0.158838
cg20496314	SYNGR1	2.07e-13	0.772699	0.369559
cg19750657	UFM1	2.21e-13	0.0824921	0.563143
cg07094298	TNIP2	4.14e-13	0.450183	0.107973
cg25178683	LGALS3BP	5.85e-13	0.418592	0.318431
cg03078551		7.11e-13	0.568046	0.886131
cg06690548	SLC7A11	2.75e-12	0.00242262	0.450826
cg17901584	DHCR24	2.87e-12	0.125311	0.751624
cg10179300	TRIO	5.71e-12	0.888073	0.63186
cg26403843	RNF145	5.83e-12	0.534659	0.448548
cg09349128		1.33e-11	0.852411	0.0646492
cg17641710	GNAI2	1.84e-11	0.763828	0.239013
cg22650271	SYNGR1	2.12e-11	0.290209	0.818062
cg27115863		2.19e-11	0.355196	0.343029
cg27637521	SOCS3	2.87e-11	0.220832	0.906987
cg10508317	SOCS3	2.9e-11	0.556597	0.927818
cg13305415	SPRY4	3.7e-11	0.532455	0.71728
cg02716826	SUGT1P1;AQP3	3.73e-11	0.313176	0.135915
cg14476101	PHGDH	5.03e-11	0.000612612	0.837579
cg09664445	KIAA0664	5.56e-11	0.344818	0.111567
cg12484113	AHDC1	6.28e-11	0.944162	0.159875
cg07504977		7.34e-11	0.782294	0.79222
cg17836612	LGALS3BP	1.05e-10	0.6459	0.741231
cg07012687	SLC16A	1.1e-10	0.759827	0.372754
cg18772573	CPSF4L	1.11e-10	0.961587	0.536957
cg26950531	DPF1	1.13e-10	0.370328	0.229305
cg21429551	GARS	1.31e-10	0.0683748	0.225445
cg01455178	SLC45A3	1.35e-10	0.15353	0.765919
cg01881899	ABCG1	1.37e-10	0.726234	0.728058
cg17782974	TRIM8	1.79e-10	0.439944	0.806394
cg17194270	SYNGR1	1.86e-10	0.576379	0.755789
cg16611584	AKAP10	2.4e-10	0.494544	0.855667
cg26470501	BCL3	2.63e-10	0.510087	0.1377
cg07730360		3.32e-10	0.0521785	0.584947
cg17738521	HIVEP2	3.51e-10	0.602559	0.840322
cg07960624	SAMD12	4.12e-10	0.23648	0.061929
cg06192883	MYO5C	7.34e-10	0.921395	0.0275808
cg18181703	SOCS3	9.05e-10	0.234685	0.255755
cg27394566	PLD4	1.04e-09	0.4192	0.230126
cg18098839	GOLIM4	1.21e-09	0.85184	0.437383
cg23813257	IL32	1.34e-09	0.234715	0.309373
cg07573872	SBNO2	1.35e-09	0.725594	0.209984
cg00108715	NT5DC2	1.71e-09	0.108975	0.646558
cg24531955	LOXL2	2.26e-09	0.995821	0.149908
cg17058475	CPT1A	2.28e-09	0.0153109	0.912215
cg26191447		2.46e-09	0.56126	0.724005
cg24678869	DENND4B	2.56e-09	0.0050869	0.000295949
cg13134297		3.21e-09	0.300341	0.000983228
cg12458003	NFASC	3.75e-09	0.149662	0.161818
cg03682690	SYNGR1	3.76e-09	0.730327	0.462635
cg10474597	SERPINE3	3.82e-09	0.699311	0.731156
cg03725309	SARS	3.93e-09	0.152917	0.746989
cg26894079	ASAM	4.06e-09	0.973847	0.142456
cg10717869	SLC41A1	4.26e-09	0.405914	0.660392
cg13123009	LY6G6E	4.57e-09	0.329277	0.478637
cg22012981	ACOX2	4.65e-09	0.0624219	0.654289
cg22950899	PTPRS	4.85e-09	0.234443	0.322689
cg06946797		5.22e-09	0.754359	0.252924
cg26361535	ZC3H3	5.46e-09	0.161549	0.632938
cg04286697	B3GNT7	5.96e-09	0.488362	0.181652
cg26651978		6.24e-09	8.89166e-05	0.371345
cg23998749		7.03e-09	0.00892731	0.172274
cg07814318	KLF13	7.44e-09	0.914352	0.685263
cg19017142		7.86e-09	0.433297	0.407339
cg25392060		8.13e-09	0.538542	0.509558
cg08857797	VPS25	8.4e-09	0.0787877	0.464502
cg01243823	NOD2	8.5e-09	0.498423	0.36018
cg08548559	PIK3IP1	8.73e-09	0.152716	0.604455
cg10919522	C14orf43	9.71e-09	0.851597	0.52973
cg25649826	USP22	1.05e-08	0.0215472	0.765511
cg04483863		1.09e-08	0.267262	0.389693
cg07037944	DAPK2	1.19e-08	0.141071	0.755708
cg24145109		1.23e-08	0.0262436	0.763221
cg08639339	SLC45A3	1.25e-08	0.0096326	NA
cg01751802	KANK2	1.32e-08	0.256746	0.355915
cg15880704	RBM20	1.36e-08	0.696382	0.00853376
cg13274938	RARA	1.43e-08	0.418609	0.440804
cg21670987	ATP8B4	1.6e-08	0.00530841	0.48717
cg06876354	RALB	1.68e-08	0.0926286	0.148077
cg10192877	ABCG1	1.68e-08	0.335265	0.908709
cg16739178		1.71e-08	0.19456	0.191034
cg14333542		1.8e-08	0.677151	0.986997
cg09607047	MIR365-1	1.96e-08	0.694301	0.042423
cg07021906	SLC7A5	2.01e-08	0.796277	0.62432
cg03218374	ANGPT4	2.28e-08	0.610075	0.564061
cg07955474	IRF8	2.4e-08	0.677126	0.316774
cg11673687	SLC9A1	2.52e-08	0.843458	0.529432
cg01798813		2.57e-08	0.352464	0.01658
cg04011474		2.59e-08	0.903767	0.769374
cg14509967	LOC404266	2.79e-08	0.664055	0.0195624
cg26800893	ATPGD1	2.87e-08	0.505365	0.10751
cg10092518	DAB1	3.01e-08	0.450982	0.894103
cg01368219	CACNA2D3	3.2e-08	0.531077	0.148649
cg13276570	ANKRD33B	3.52e-08	0.0815481	0.916282
cg25217710		3.71e-08	0.705163	0.231857
cg01130991		4e-08	0.159978	0.264457
cg11261850		4.01e-08	0.120065	0.645543
cg22875823	SYNGAP1	4.28e-08	0.472365	0.112268
cg04557677	JAK3	4.53e-08	0.615812	0.0276281
cg27470213	LGALS3BP	4.63e-08	0.386593	0.589006
cg22713958	LGALS3BP	4.74e-08	0.251711	0.856358
cg05119988	SC4MOL	4.87e-08	0.793476	0.283153
cg14780837	SYNGR1	4.96e-08	0.0790707	0.560553
cg18091083	RPTOR	5.04e-08	0.500388	0.122522
cg00222799	ABCG1	5.27e-08	0.141969	0.762037
cg13708645	KDM2B	5.35e-08	0.0801283	0.291413
cg11152384		5.4e-08	0.314249	0.188565
cg26955383	CALHM1	6.04e-08	0.663064	0.254265
cg03500056	ABAT	6.19e-08	0.204462	0.248511
cg09182678		6.22e-08	0.17895	0.995773
cg02711608	SLC1A5	6.25e-08	0.169223	0.507328
cg02286155		6.39e-08	0.0283389	0.23624
cg13028635		6.68e-08	0.106991	0.78361
cg04816311	C7orf50	6.68e-08	0.803904	NA
cg12593793		7.12e-08	0.398582	0.48187
cg23172671		7.47e-08	0.726466	0.408812
cg14017402		7.75e-08	0.146455	0.567662
cg13139542		7.93e-08	0.253542	0.30944
cg14352682	C6orf136	8.84e-08	0.1033	0.0808726
cg01671681	PLCH1	9.53e-08	0.920665	0.224624
cg12001357	CHRNG	9.87e-08	0.745424	0.827302
cg02571142	DKK4	9.91e-08	0.00331318	0.665954
cg20507228	MAN2A2	1.01e-07	0.0884515	0.273419
cg09491962	SLIT1	1.05e-07	0.214216	0.576095
cg21766592	SLC1A5	1.07e-07	0.0997567	0.641628
cg01597398		1.08e-07	0.696675	0.123193
cg01526748	FGF12	1.18e-07	0.758215	0.438771
