# Supplementary material for: Association of Body Mass Index with DNA Methylation and Gene Expression in Blood Cells and Relations to Cardiometabolic Disease: A Mendelian Randomization Approach
Source: PLoS Med. 2017 Jan 17;14(1):e1002215. doi: 10.1371/journal.pmed.1002215 (PMC5240936; doi:10.1371/journal.pmed.1002215)
Supplement: S6 Table — (XLSX) [file pmed.1002215.s024.xlsx]

## Sheet: Suppl Table 6
Supplemental Table 6: Sex-stratified models for cg26651978 (LGALS3BP) in the replication cohorts
Cohort	Gender	Beta	SD	Z	p	n
GOLDN	Males	-0.001	0.0004	-2.52	0.01	475
ARIC	Males	-0.0075	0.002	-3.67	0.00025	751
PIVUS	Males	-0.0007613	0.0004013	-1.89727	0.0577928	485
GOLDN	Females	-0.0005	0.0003	-1.73	0.08	519
ARIC	Females	-0.0018	0.0011	-1.59	0.111	1334
PIVUS	Females	-0.000741	0.0003321	-2.23159	0.0256422	482
