# Supplementary material for: Association of Body Mass Index with DNA Methylation and Gene Expression in Blood Cells and Relations to Cardiometabolic Disease: A Mendelian Randomization Approach
Source: PLoS Med. 2017 Jan 17;14(1):e1002215. doi: 10.1371/journal.pmed.1002215 (PMC5240936; doi:10.1371/journal.pmed.1002215)
Supplement: S12 Table — (XLSX) [file pmed.1002215.s030.xlsx]

## Sheet: Suppl Table 12
S12 Table: Results from the reverse Mendelian randomization (BMI affecting DNA methylation) for the 83 replicated CpGs using the BMI GRS IV
				FHS lab batch #1 (n=1766)			FHS lab batch #2 (n=404)			Meta-analysis (n=2170)
CpG Probename	Gene Name	Discovery p-value	Replication p-value	Causal beta	Causal SE	Causal p-value	Causal beta	Causal SE	Causal p-value	Meta-Analysis Causal p-value
cg23998749		7.03e-09	1.37e-07	0.095891	0.037877	0.011352	0.129864	0.09998	0.193979	0.00445104
cg06500161	ABCG1	7.55e-43	1.27e-18	0.09036	0.035407	0.01071	0.0829	0.091351	0.364152	0.00706161
cg25649826	USP22	1.05e-08	1.18e-06	0.081043	0.037886	0.032428	0.235123	0.133496	0.078193	0.00715864
cg07730360		3.32e-10	8e-07	0.068782	0.036366	0.058573	0.16835	0.104506	0.1072	0.0163484
cg26950531	DPF1	1.13e-10	2.22e-06	-0.078257	0.036685	0.032907	-0.094659	0.09487	0.318388	0.0185251
cg13274938	RARA	1.43e-08	9.57e-08	0.080859	0.037554	0.031309	0.070684	0.091618	0.440406	0.0228833
cg13708645	KDM2B	5.35e-08	3.33e-10	0.095478	0.039126	0.014676	0.008551	0.09003	0.924335	0.0249064
cg01751802	KANK2	1.32e-08	4.3e-05	0.054441	0.037011	0.141306	0.297979	0.147078	0.042765	0.0277641
cg06876354	RALB	1.68e-08	6.15e-09	0.077176	0.037649	0.040373	0.070382	0.093869	0.453381	0.0297889
cg00108715	NT5DC2	1.71e-09	1.61e-08	0.064954	0.036278	0.073382	0.087508	0.089918	0.330453	0.0418437
cg24678869	DENND4B	2.56e-09	2.64e-05	0.066453	0.036595	0.06938	0.084313	0.094614	0.372865	0.0431053
cg04286697	B3GNT7	5.96e-09	0.000122	0.058463	0.036616	0.110342	0.13509	0.103075	0.189992	0.0448932
cg02571142	DKK4	9.91e-08	5.34e-05	0.055899	0.036887	0.129667	0.154708	0.109254	0.156764	0.0479515
cg14017402		7.75e-08	2.35e-08	0.077891	0.038052	0.040659	0.025954	0.087284	0.766196	0.0482432
cg24145109		1.23e-08	1.62e-07	0.053677	0.035753	0.133274	0.159521	0.111115	0.151105	0.0484359
cg03500056	ABAT	6.19e-08	2.1e-07	0.04795	0.036113	0.184258	0.230989	0.130257	0.076172	0.0497052
cg10179300	TRIO	5.71e-12	0.000106	0.081827	0.037896	0.030828	0.001968	0.090566	0.982663	0.0502613
cg18098839	GOLIM4	1.21e-09	1.42e-06	-0.069884	0.036791	0.057501	-0.034874	0.088806	0.694541	0.0596704
cg11673687	SLC9A1	2.52e-08	0.000251	0.068036	0.037512	0.069725	0.046742	0.088473	0.597278	0.0622835
cg19750657	UFM1	2.21e-13	5.6e-13	0.058553	0.036243	0.10619	0.090072	0.09627	0.349468	0.0627349
cg01368219	CACNA2D3	3.2e-08	6.87e-07	0.046141	0.036019	0.200193	0.151444	0.103349	0.142819	0.0738489
cg04927537	LGALS3BP	7.11e-17	6.28e-10	0.045719	0.036168	0.206199	0.140584	0.100342	0.161203	0.081063
cg21429551	GARS	1.31e-10	6.76e-05	-0.043587	0.034986	0.212831	-0.146662	0.103558	0.156707	0.0828083
cg08857797	VPS25	8.4e-09	4.43e-09	0.040382	0.036489	0.268437	0.191139	0.118798	0.107628	0.0906205
cg09664445	KIAA0664	5.56e-11	1.73e-05	0.062081	0.036486	0.088847	0.025717	0.087913	0.769883	0.0966318
cg01130991		4e-08	2.19e-07	0.046238	0.036576	0.206172	0.112442	0.098227	0.252325	0.102232
cg10919522	C14orf43	9.71e-09	5.44e-09	-0.03427	0.035488	0.334205	-0.22171	0.128162	0.083643	0.105864
cg26361535	ZC3H3	5.46e-09	3.43e-08	0.047493	0.036634	0.194824	0.094143	0.097222	0.332879	0.112463
cg12484113	AHDC1	6.28e-11	8.72e-10	0.051349	0.036406	0.158401	0.062933	0.092724	0.497319	0.11752
cg26894079	ASAM	4.06e-09	3.52e-09	-0.050499	0.036671	0.168485	-0.06637	0.091881	0.470081	0.120195
cg06946797		5.22e-09	1.03e-09	0.049824	0.038203	0.192166	0.082552	0.097488	0.397107	0.123115
cg26403843	RNF145	5.83e-12	5.59e-10	0.048871	0.034869	0.161046	0.046782	0.088224	0.595929	0.135375
cg27470213	LGALS3BP	4.63e-08	2.64e-07	-0.037958	0.03501	0.278275	-0.110925	0.092977	0.232856	0.135548
cg03078551		7.11e-13	4.3e-10	-0.027009	0.035695	0.449267	-0.199178	0.113516	0.079323	0.150125
cg25178683	LGALS3BP	5.85e-13	1e-09	0.040386	0.035944	0.261192	0.09112	0.092863	0.326476	0.150773
cg00574958	CPT1A	2.2e-29	5.94e-15	-0.052558	0.035341	0.136974	-0.011375	0.09005	0.899477	0.162611
cg13139542		7.93e-08	2.67e-05	0.044528	0.036697	0.224981	0.064175	0.094276	0.496055	0.165047
cg10474597	SERPINE3	3.82e-09	2.19e-06	0.044223	0.03488	0.204849	0.040695	0.084653	0.630712	0.176619
cg02286155		6.39e-08	0.000241	0.034483	0.036633	0.346547	0.103218	0.096724	0.28591	0.190409
cg07573872	SBNO2	1.35e-09	1.68e-09	-0.058856	0.036987	0.111552	0.030136	0.091837	0.7428	0.195538
cg10092518	DAB1	3.01e-08	0.000236	-0.051639	0.03654	0.157598	0.016626	0.090217	0.853784	0.231809
cg14870271	LGALS3BP	4.87e-16	1.51e-05	0.033673	0.036113	0.35111	0.071254	0.089554	0.426234	0.23628
cg26470501	BCL3	2.63e-10	0.000127	-0.055537	0.035876	0.121616	0.045892	0.091912	0.617566	0.237372
cg11024682	SREBF1	4.82e-22	1.22e-15	0.021018	0.035344	0.552053	0.163891	0.113867	0.150061	0.247256
cg07094298	TNIP2	4.14e-13	1.17e-07	-0.052122	0.035224	0.138939	0.039069	0.087975	0.656975	0.252716
cg24531955	LOXL2	2.26e-09	1.46e-06	-0.033925	0.036061	0.34683	-0.048863	0.089238	0.583992	0.277966
cg27243685	ABCG1	2.29e-15	4.91e-12	0.038806	0.035897	0.279687	0.017727	0.090458	0.84463	0.289187
cg17738521	HIVEP2	3.51e-10	0.000107	-0.057478	0.03649	0.115216	0.088584	0.102094	0.385573	0.294968
cg16611584	AKAP10	2.4e-10	0.00014	0.023383	0.035585	0.511109	0.099321	0.096061	0.301162	0.298979
cg07037944	DAPK2	1.19e-08	4.32e-09	-0.04032	0.036532	0.269737	-0.007832	0.08966	0.930388	0.301361
cg26955383	CALHM1	6.04e-08	0.000115	0.021046	0.035829	0.556936	0.102005	0.098957	0.302633	0.329874
cg09349128		1.33e-11	1.01e-10	-0.045114	0.036393	0.215116	0.045792	0.094527	0.628082	0.362974
cg04816311	C7orf50	6.68e-08	4.19e-08	0.013455	0.036111	0.709439	0.110831	0.097649	0.256379	0.409104
cg08548559	PIK3IP1	8.73e-09	5.38e-10	0.020565	0.03689	0.577206	0.066363	0.094967	0.484674	0.421253
cg13134297		3.21e-09	4.59e-05	0.029253	0.037526	0.435666	0.010966	0.090899	0.903975	0.450014
cg18181703	SOCS3	9.05e-10	1.18e-07	-0.031797	0.035049	0.364293	0.025764	0.088199	0.770199	0.488512
cg17901584	DHCR24	2.87e-12	4.14e-12	0.009907	0.036764	0.787564	0.098119	0.107377	0.36083	0.524089
cg14476101	PHGDH	5.03e-11	2.81e-06	0.016857	0.036687	0.645879	0.047179	0.093908	0.615388	0.527924
cg10192877	ABCG1	1.68e-08	2.32e-05	0.013823	0.036495	0.70486	0.059911	0.09345	0.521459	0.536492
cg10717869	SLC41A1	4.26e-09	6.56e-10	0.019929	0.036169	0.581638	0.022634	0.089213	0.799719	0.544157
cg26651978		6.24e-09	1.68e-05	0.004566	0.035773	0.898441	0.106826	0.103098	0.300124	0.574237
cg22012981	ACOX2	4.65e-09	2.71e-06	0.027236	0.03595	0.448677	-0.028732	0.09168	0.75398	0.583333
cg09182678		6.22e-08	1.59e-10	-0.033724	0.0361	0.350215	0.072833	0.097007	0.452774	0.603567
cg01526748	FGF12	1.18e-07	1.11e-05	-0.004405	0.036485	0.903905	0.161832	0.111937	0.148247	0.607057
cg17836612	LGALS3BP	1.05e-10	1.24e-08	0.008112	0.035509	0.819304	0.038212	0.087118	0.660936	0.692694
cg17782974	TRIM8	1.79e-10	1.05e-05	0.016447	0.03536	0.641837	-0.015578	0.089039	0.861109	0.730638
cg11202345	LGALS3BP	6.22e-15	4.2e-05	-0.002469	0.036099	0.945464	0.08479	0.091269	0.352879	0.7348
cg10508317	SOCS3	2.9e-11	1.12e-05	-0.023222	0.035152	0.508855	0.057041	0.095001	0.548226	0.735913
cg12593793		7.12e-08	1.06e-09	-0.019732	0.035892	0.582484	0.036918	0.09205	0.688374	0.746563
cg03725309	SARS	3.93e-09	6e-07	-0.007014	0.032266	0.827902	-0.022571	0.082911	0.785445	0.753895
cg01881899	ABCG1	1.37e-10	0.000198	-0.011571	0.034656	0.738475	-0.001449	0.085837	0.986531	0.757673
cg07504977		7.34e-11	1.24e-11	-0.034193	0.037683	0.364195	0.125992	0.101021	0.21233	0.778599
cg21766592	SLC1A5	1.07e-07	0.000134	-0.020296	0.034976	0.561712	0.051832	0.091381	0.570569	0.780161
cg17501210	RPS6KA2	4.14e-21	1.07e-06	-0.008841	0.033892	0.794194	0.124292	0.106212	0.241908	0.787882
cg01243823	NOD2	8.5e-09	4.17e-07	-0.023726	0.034554	0.492319	0.077477	0.094864	0.414088	0.789089
cg17058475	CPT1A	2.28e-09	1.17e-05	0.002623	0.036327	0.942436	0.041452	0.094772	0.66183	0.799728
cg27115863		2.19e-11	5.31e-08	0.005347	0.035306	0.879632	0.019028	0.088851	0.830425	0.818901
cg23172671		7.47e-08	8.01e-05	-0.003545	0.035187	0.919743	0.053951	0.089851	0.548211	0.866649
cg06192883	MYO5C	7.34e-10	3.21e-09	0.01738	0.035364	0.623096	-0.063276	0.091197	0.487783	0.885209
cg13123009	LY6G6E	4.57e-09	1.48e-13	0.003397	0.035963	0.924739	-0.042221	0.092095	0.646631	0.91052
cg26800893	ATPGD1	2.87e-08	4.29e-07	0.016505	0.036836	0.654094	-0.075839	0.095469	0.426971	0.950659
cg19017142		7.86e-09	8.35e-06	0.002779	0.036013	0.9385	-0.021322	0.088459	0.809524	0.972649
cg07814318	KLF13	7.44e-09	1.17e-09	-0.018465	0.037328	0.620825	0.108958	0.098152	0.26696	0.974342
